# Supplementary material
Source: Royal Society of Chemistry journal article supplement (doi:10.1039/d5ta09142j)
Supplement: d5ta09142j1.pdf [file d5ta09142j1.pdf]

Supporting Information

**Activating BaWO<sub>4</sub> ceramic through the atomic-level Ni doping for enhanced hydrogen evolution reaction**

Zhendian Li<sup>a</sup>, Yuan Ha<sup>a,b\*</sup>, Ziqi An<sup>a</sup>, Xian Cao<sup>a</sup>, Linzhuang Xing<sup>a</sup>, Zhimin Li<sup>a\*</sup>

Z. Li, Y. Ha, Z. An, X. Cao, L. Xing, Z. Li

<sup>a</sup>School of Advanced Materials and Nanotechnology, Xidian University, Xi'an 710071, P. R. China

<sup>b</sup>Building B5, Guangzhou Institute of Technology, Xidian University, China-Singapore  
Guangzhou Knowledge City, Huangpu District, Guangzhou, China

\*Corresponding author. E-mail: hayuan@xidian.edu.cn (Y. Ha), lizhmin@163.com (Z. Li)

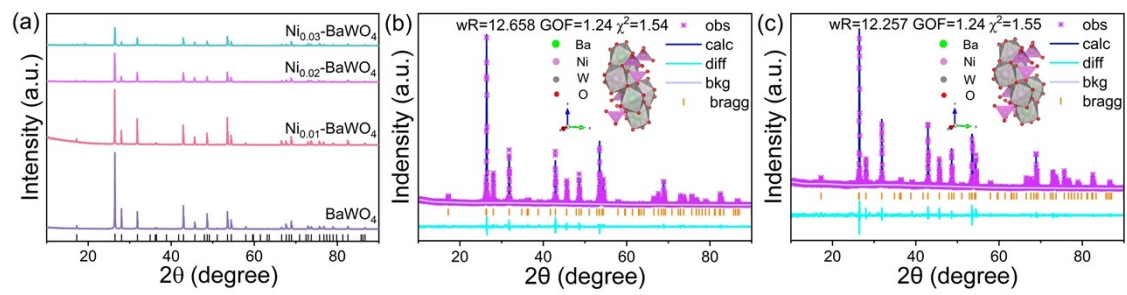

**Figure S1.** (a) XRD pattern of  $\text{Ni}_x\text{-BaWO}_4$ ; (b) Rietveld refinement profile and crystal structure of pure  $\text{Ni}_{0.02}\text{-BaWO}_4$  and (c)  $\text{Ni}_{0.03}\text{-BaWO}_4$  ceramics.

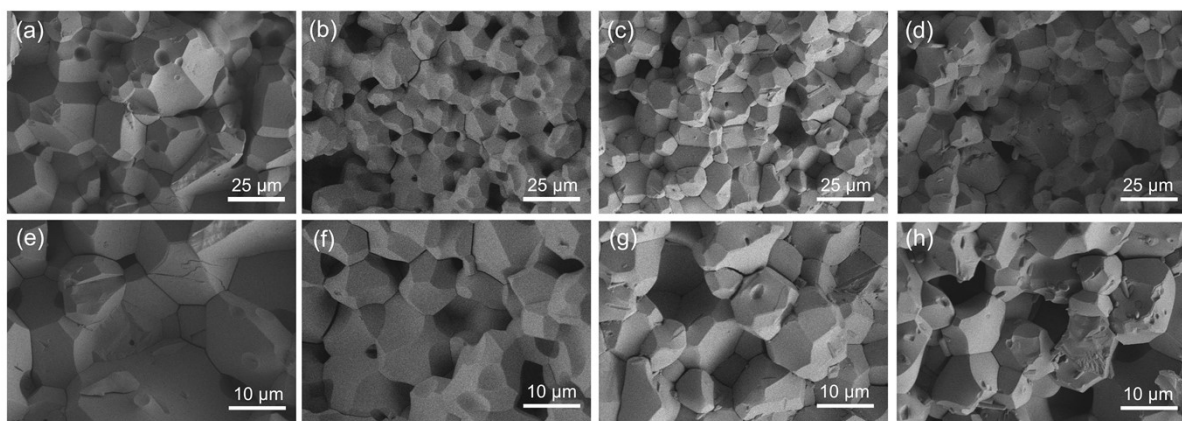

**Figure S2.** (a) and (e) SEM images of BaWO<sub>4</sub>; (b) and (f) SEM images of Ni<sub>0.01</sub>-BaWO<sub>4</sub>; (c) and (g) SEM images of Ni<sub>0.02</sub>-BaWO<sub>4</sub>; (d) and (h) SEM images of Ni<sub>0.03</sub>-BaWO<sub>4</sub>.

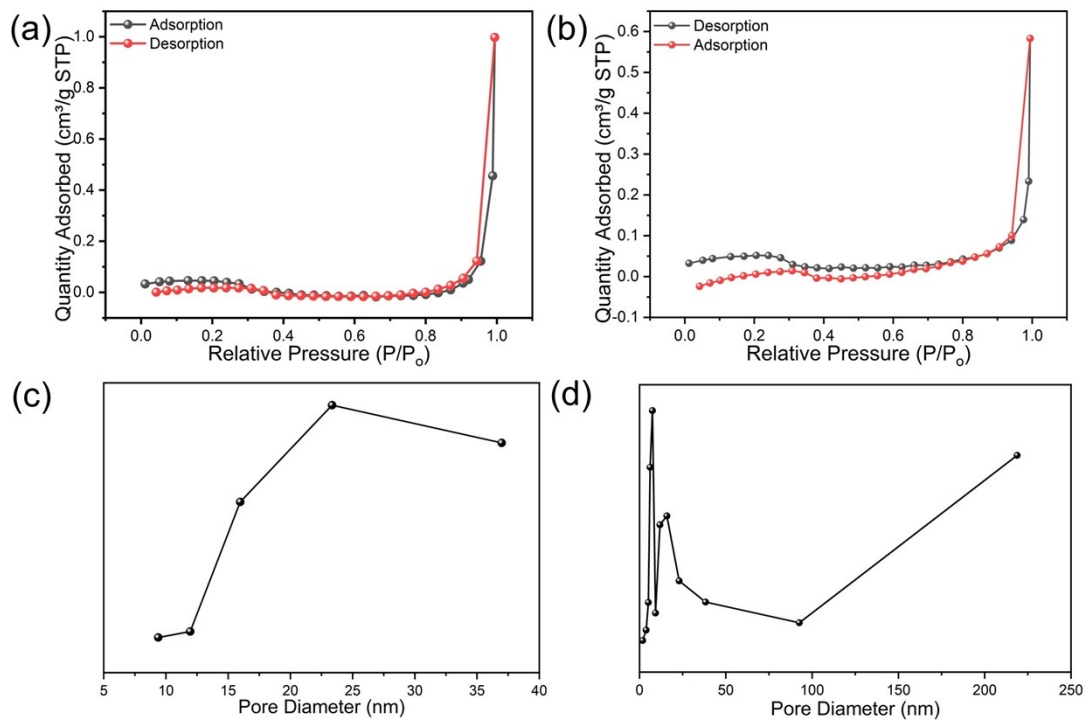

**Figure S3.** (a) The N<sub>2</sub> adsorption/desorption isotherm of BaWO<sub>4</sub> ceramics; (b) The N<sub>2</sub> adsorption/desorption isotherm of Ni<sub>0.01</sub>-BaWO<sub>4</sub> ceramics; (c) The pore size distribution of BaWO<sub>4</sub> ceramics; (d) The pore size distribution of Ni<sub>0.01</sub>-BaWO<sub>4</sub> ceramics.

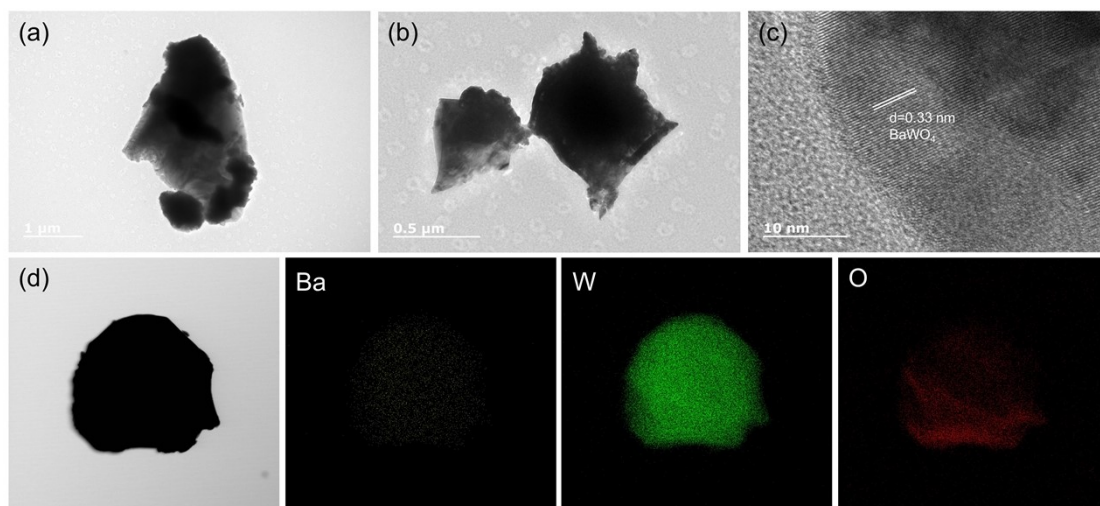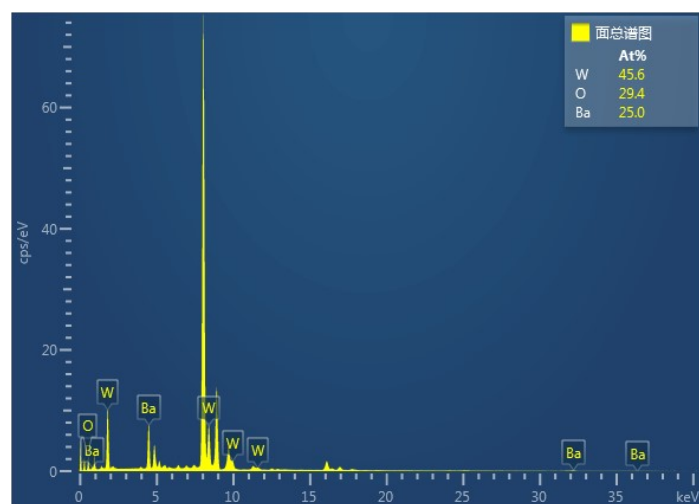

**Figure S4.** TEM and EDS mapping images of BaWO<sub>4</sub>.

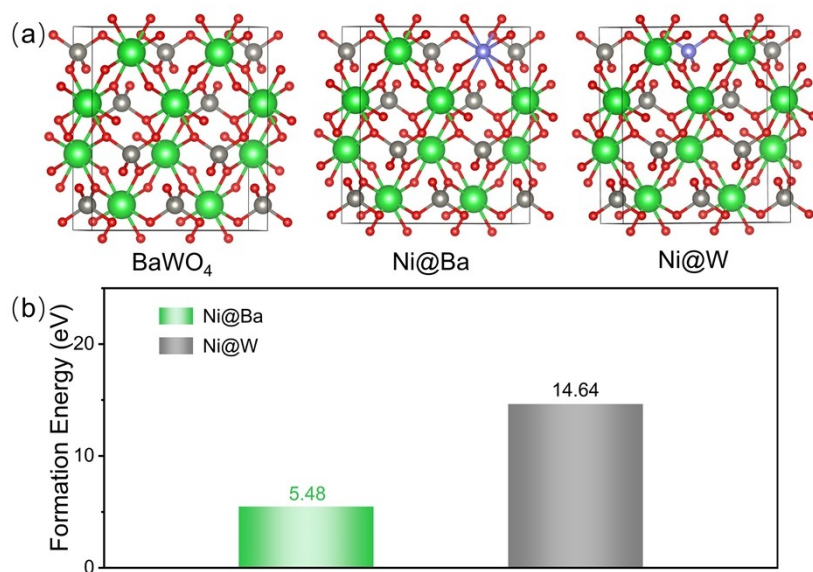

**Figure S5.** (a) Structural models of  $\text{BaWO}_4$ ,  $\text{Ni@Ba}$ , and  $\text{Ni@W}$ ; (b) Formation energies of  $\text{Ni@Ba}$  and  $\text{Ni@W}$ .

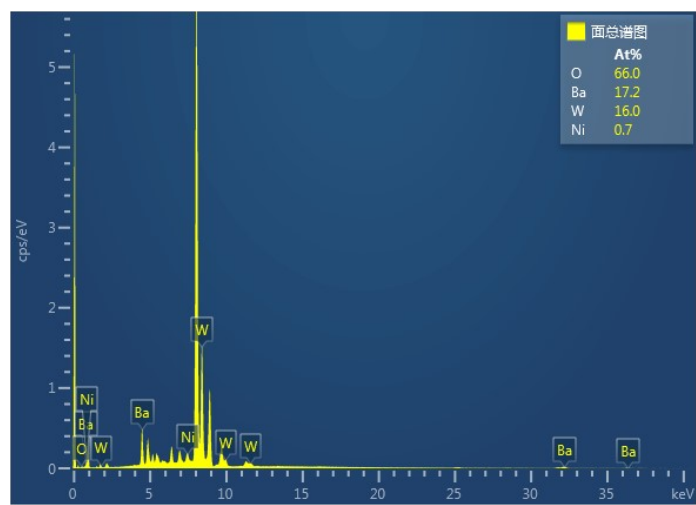

**Figure S6.** Elemental content distribution of EDS spectra of Ni<sub>0.01</sub>-BaWO<sub>4</sub>.

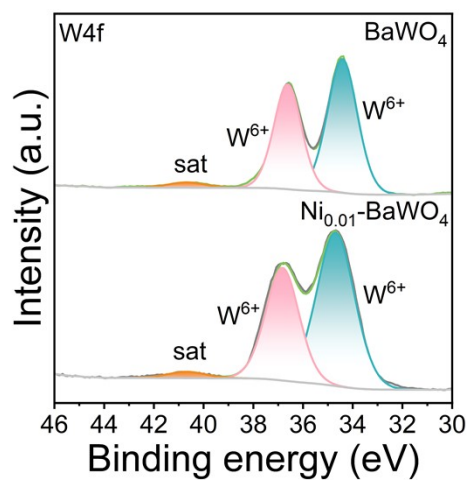

**Figure S7.** High-resolution W 4f XPS spectra of BaWO<sub>4</sub> and Ni<sub>0.01</sub>-BaWO<sub>4</sub>.

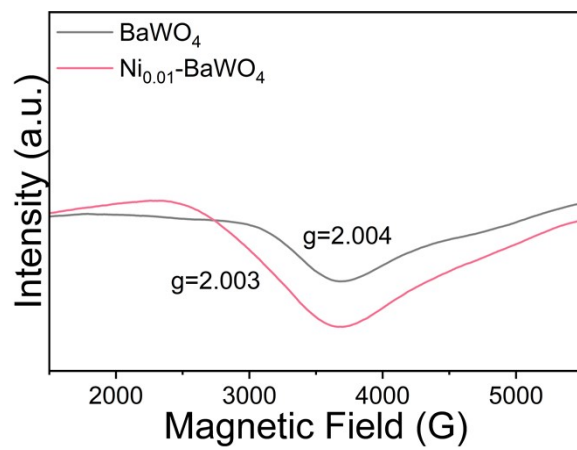

**Figure S8.** The EPR spectra of BaWO<sub>4</sub> and Ni<sub>0.01</sub>-BaWO<sub>4</sub>.

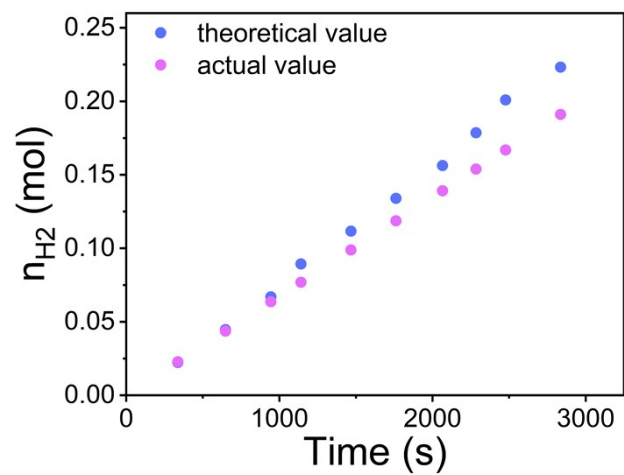

**Figure S9.** Graph of hydrogen production at different times.

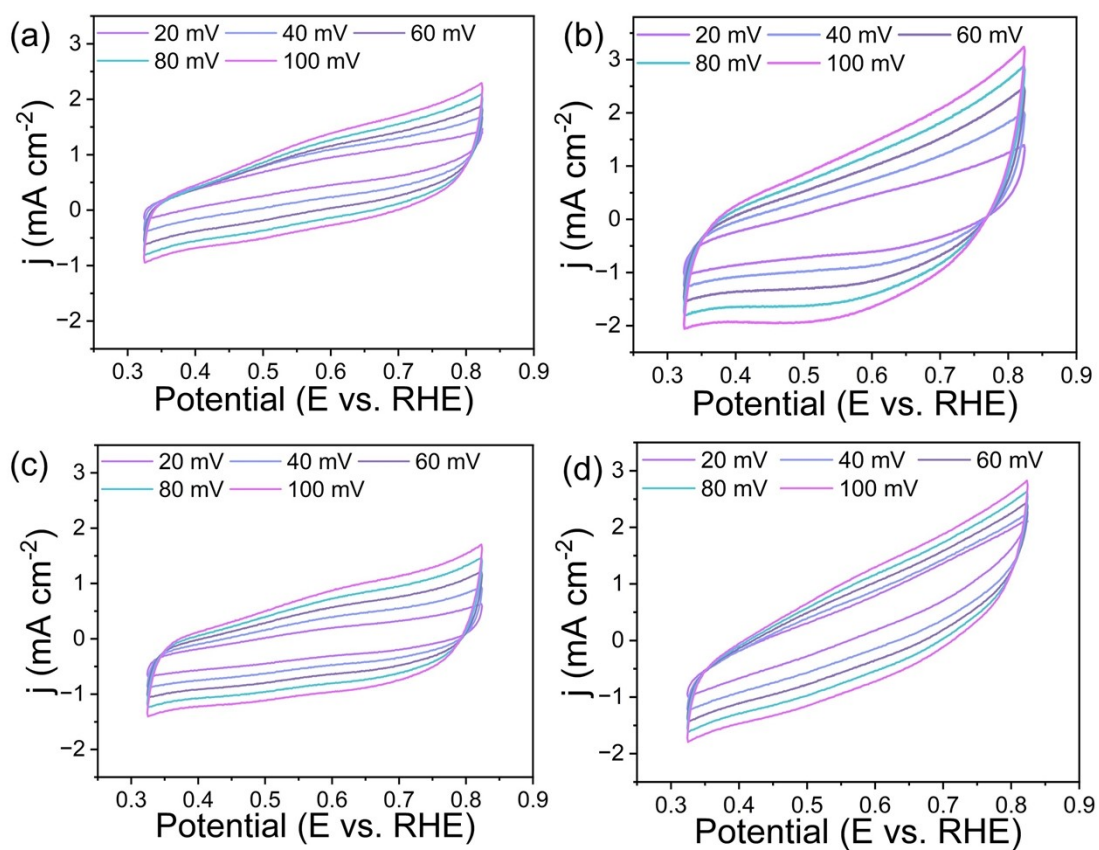

**Figure S10.** (a)  $\text{BaWO}_4$ ; (b)  $\text{Ni}_{0.01}\text{-BaWO}_4$ ; (c)  $\text{Ni}_{0.02}\text{-BaWO}_4$ ; (d)  $\text{Ni}_{0.03}\text{-BaWO}_4$ ; at different scan rates for CV

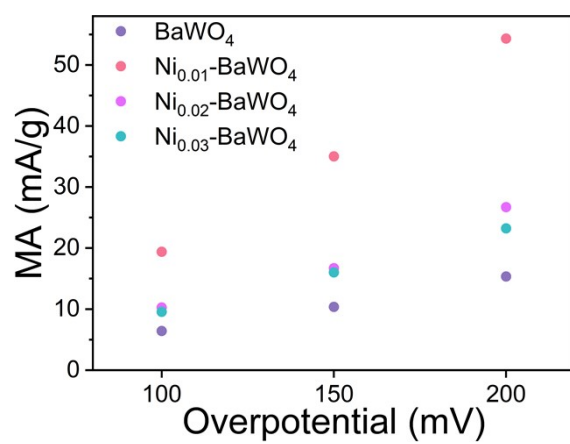

**Figure S11.** The mass activity of four catalyst.

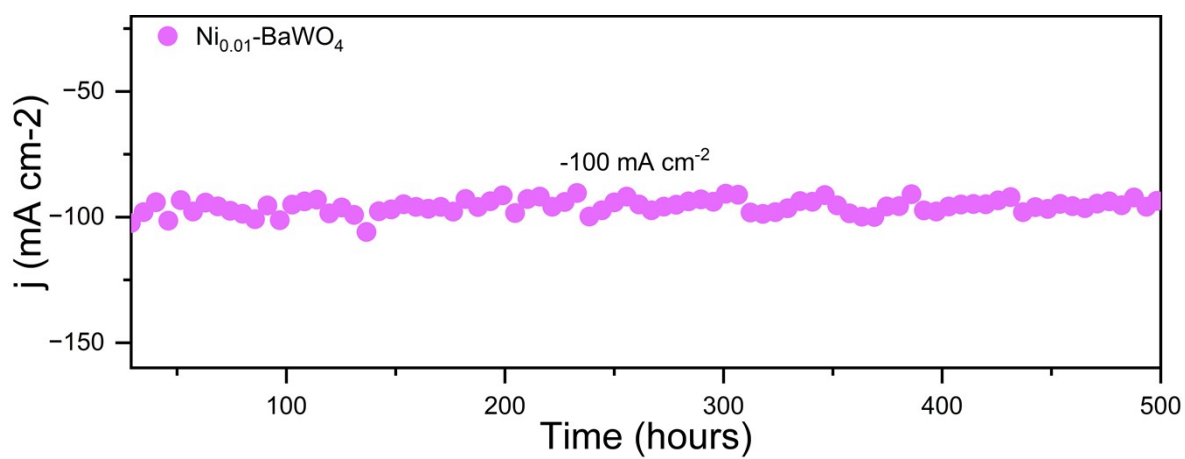

**Figure S12.** I-t curves of  $\text{Ni}_{0.01}\text{-BaWO}_4$  at current densities of  $100 \text{ mA cm}^{-2}$ .

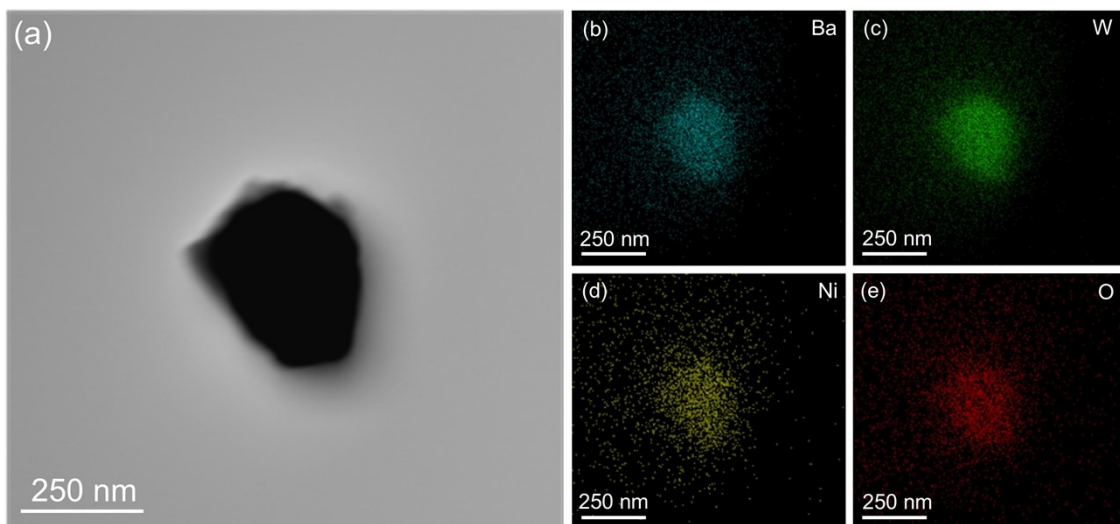

**Figure S13.** EDS mapping images of  $\text{Ni}_{0.01}\text{-BaWO}_4$  after 500-hour long cycling.

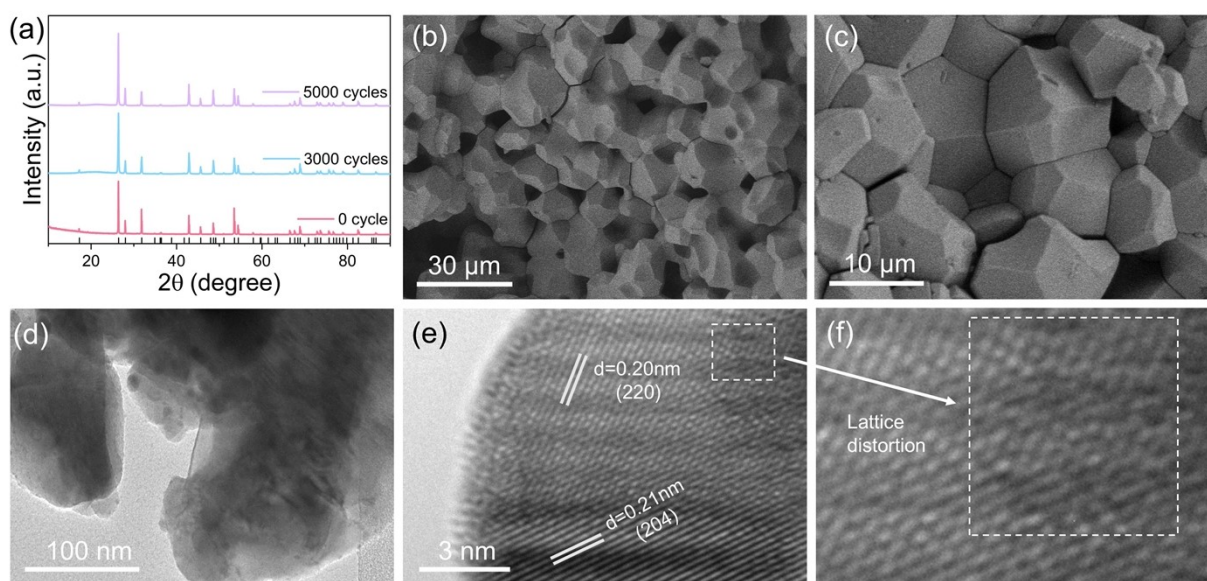

**Figure S14.** (a) At the current density of  $100\text{ mA cm}^{-2}$ ,  $\text{Ni}_{0.01}\text{-BaWO}_4$  was XRD before and after the long-term cycle; (b-c) SEM images of  $\text{Ni}_{0.01}\text{-BaWO}_4$  at various magnifications; (d) TEM image of  $\text{Ni}_{0.01}\text{-BaWO}_4$ ; (e-f) HRTEM images of  $\text{Ni}_{0.01}\text{-BaWO}_4$

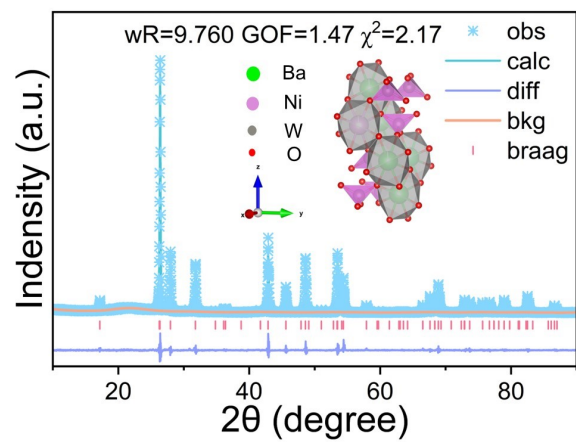

**Figure S15.** Rietveld refinement of  $\text{Ni}_{0.01}\text{-BaWO}_4$  after 5000 cycles long-term cycling test.

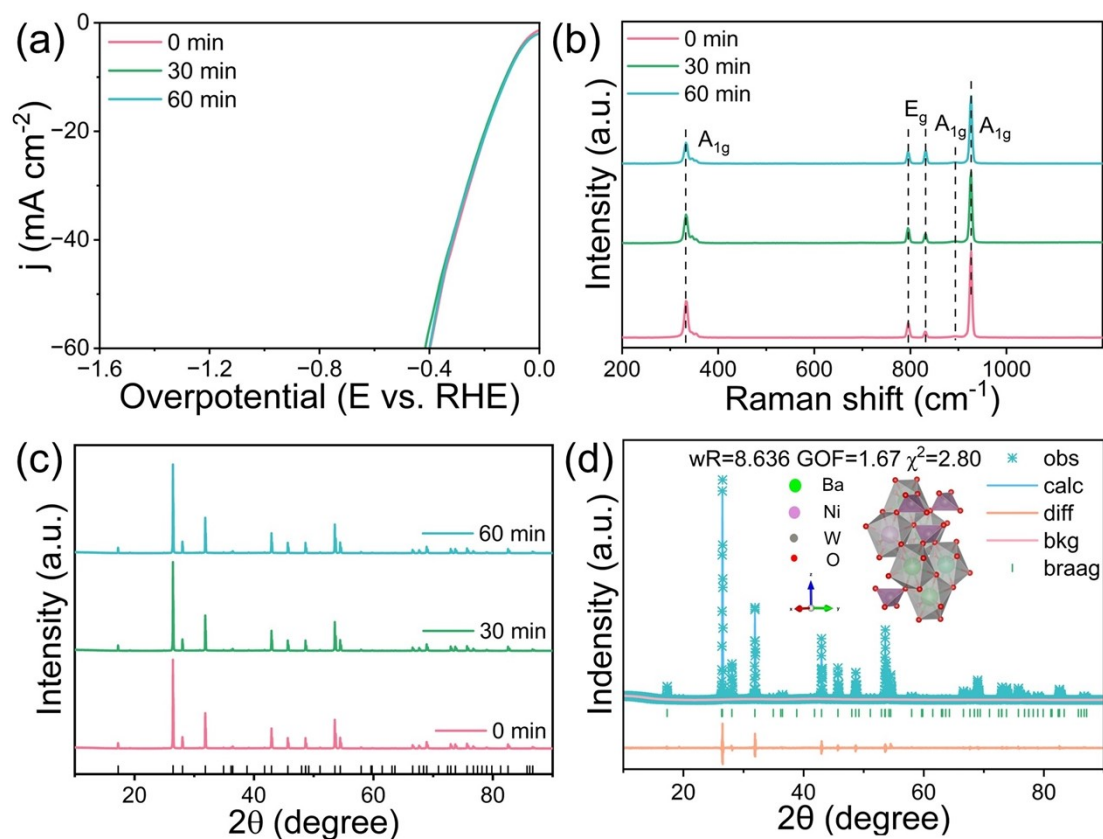

**Figure S16.** (a) HER polarization curves of  $\text{Ni}_{0.01}\text{-BaWO}_4$  with different ultrasonication durations; (b) Raman spectra of  $\text{Ni}_{0.01}\text{-BaWO}_4$  with different ultrasonication durations; (c) XRD of  $\text{Ni}_{0.01}\text{-BaWO}_4$  after different ultrasonic time; (d) Rietveld refinement of  $\text{Ni}_{0.01}\text{-BaWO}_4$  after 60 min ultrasonication.

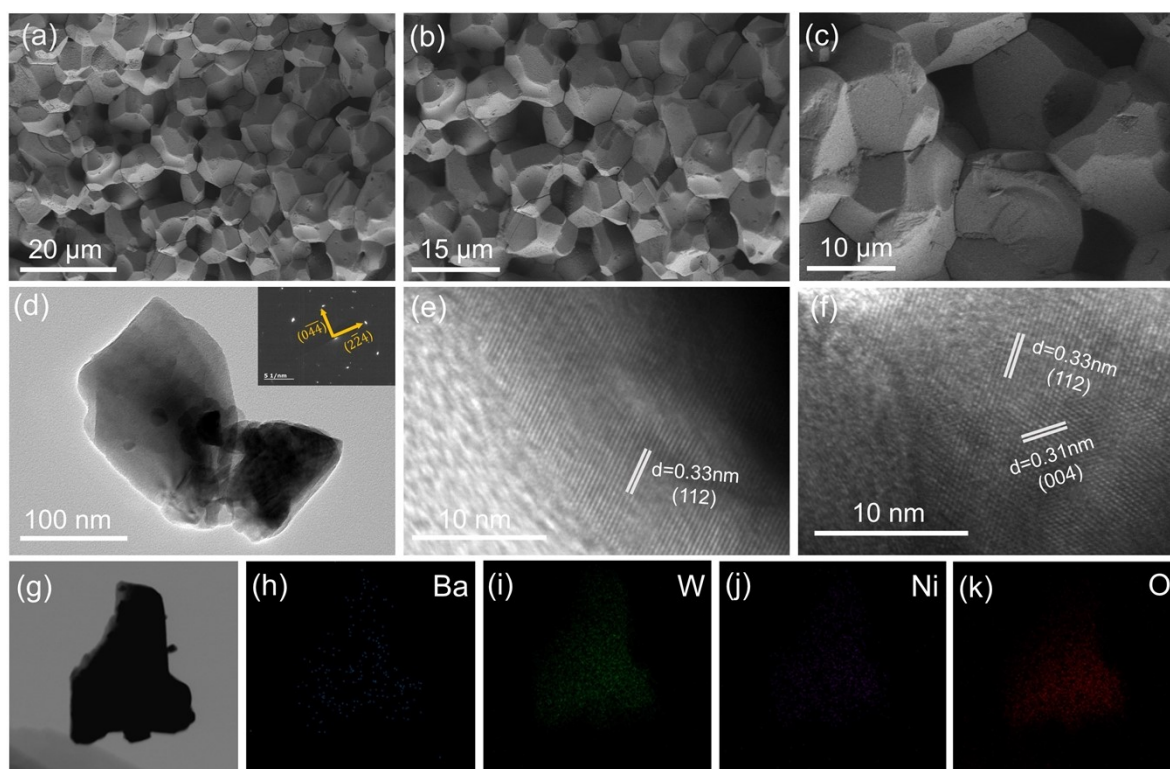

**Figure S17.** (a-c) SEM micrographs of  $\text{Ni}_{0.01}\text{-BaWO}_4$  post 60 min sonication;(d) TEM image of  $\text{Ni}_{0.01}\text{-BaWO}_4$  subjected to 60 min ultrasonic processing;(e-f) HRTEM images of  $\text{Ni}_{0.01}\text{-BaWO}_4$  after 60 min ultrasonic;(g) STEM image of  $\text{Ni}_{0.01}\text{-BaWO}_4$  following 60 min ultrasonic;(h-k) EDS elemental mapping images of  $\text{Ni}_{0.01}\text{-BaWO}_4$  under 60 min ultrasonic.

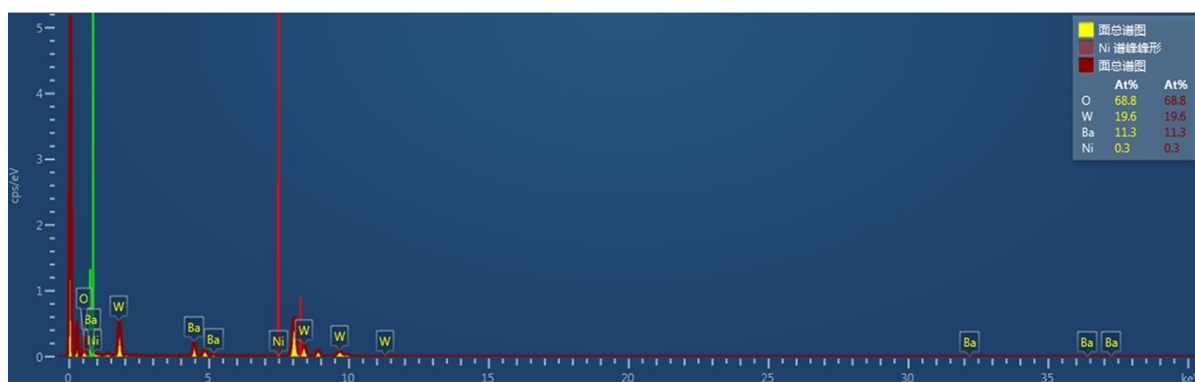

**Figure S18.** EDS spectral element content distribution of  $\text{Ni}_{0.01}\text{-BaWO}_4$  after ultrasound for 60 min.

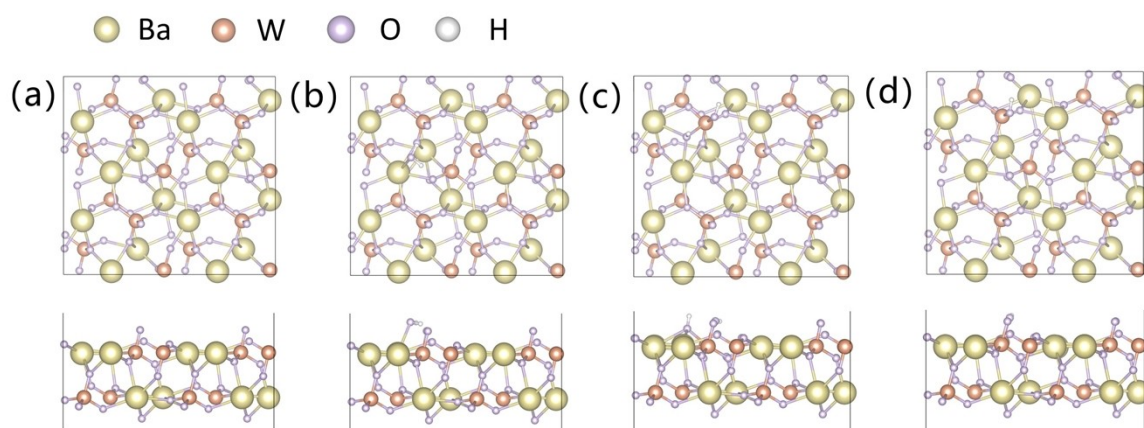

**Figure S19.** The adsorption model of BaWO<sub>4</sub> after structural optimization

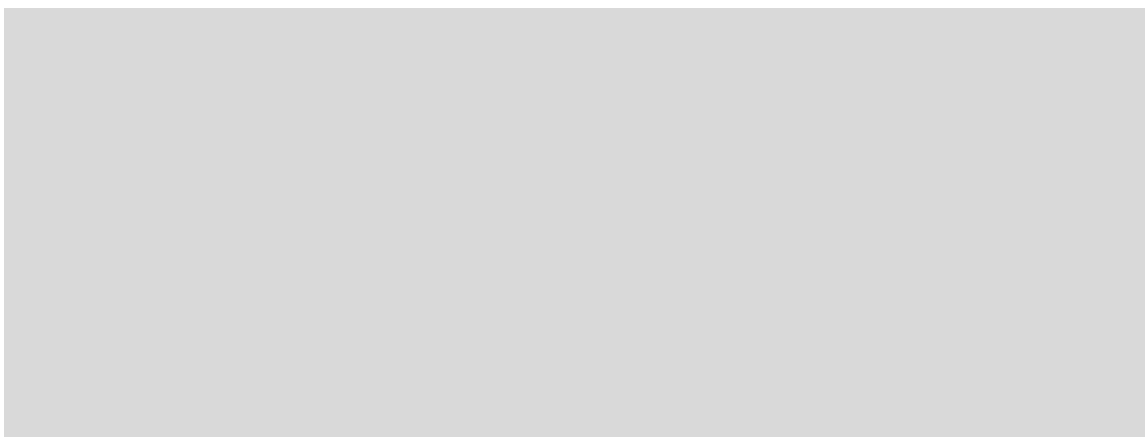

**Figure S20.** The adsorption model of Ni-BaWO<sub>4</sub> after structural optimization.

**Table S1** The porosity data of BaWO<sub>4</sub> and Ni<sub>0.01</sub>-BaWO<sub>4</sub>.

| Samples                               | Sample quality (g) | mercury intrusion volume (m <sup>3</sup> /g) | Porosity (%) |
|---------------------------------------|--------------------|----------------------------------------------|--------------|
| BaWO <sub>4</sub>                     | 1.6932             | 0.0286                                       | 14.7784      |
| Ni <sub>0.01</sub> -BaWO <sub>4</sub> | 1.6229             | 0.0424                                       | 20.6891      |

**Table S2** The sintering density data of each sample.

| Samples                               | $m_1$ for dry weight<br>(g) | $m_2$ for buoyant<br>weight (g) | $m_3$ for wet<br>weight (g) | volume density (<br>$\text{g cm}^{-3}$ ) |
|---------------------------------------|-----------------------------|---------------------------------|-----------------------------|------------------------------------------|
| BaWO <sub>4</sub>                     | 0.5512                      | 0.5602                          | 0.4606                      | 5.534                                    |
| Ni <sub>0.01</sub> -BaWO <sub>4</sub> | 0.5516                      | 0.5527                          | 0.4494                      | 5.340                                    |
| Ni <sub>0.02</sub> -BaWO <sub>4</sub> | 0.5539                      | 0.5616                          | 0.4595                      | 5.425                                    |
| Ni <sub>0.03</sub> -BaWO <sub>4</sub> | 0.5534                      | 0.5614                          | 0.4602                      | 5.468                                    |

**Table S3.** The BET data of BaWO<sub>4</sub> and Ni<sub>0.01</sub>-BaWO<sub>4</sub>.

| <b>Sample</b>                         | <b>Surface Area (m<sup>2</sup>/g)</b> | <b>Pore Size (nm)</b> |
|---------------------------------------|---------------------------------------|-----------------------|
| BaWO <sub>4</sub>                     | 0.1763                                | 34.7529               |
| Ni <sub>0.01</sub> -BaWO <sub>4</sub> | 0.1963                                | 29.2948               |

**Table S4.** The free energies of different samples.

|                  | BaWO <sub>4</sub> | Ni@Ba      | Ni@W       |
|------------------|-------------------|------------|------------|
| Free energy (eV) | -350.07912        | -344.59922 | -335.43839 |

**Table S5.** ICP results of Ni<sub>x</sub>-BaWO<sub>4</sub>

| Sample name                           | Sample quality m <sub>0</sub> (g) | Test element | Sample element content W (%) |
|---------------------------------------|-----------------------------------|--------------|------------------------------|
| BaWO <sub>4</sub>                     | 0.0446                            | Ba           | 44.85%                       |
|                                       |                                   | W            | 55.12%                       |
| Ni <sub>0.01</sub> -BaWO <sub>4</sub> | 0.0463                            | Ba           | 43.71%                       |
|                                       |                                   | W            | 56.09%                       |
|                                       |                                   | Ni           | 0.1%                         |
| Ni <sub>0.02</sub> -BaWO <sub>4</sub> | 0.0428                            | Ba           | 38.85%                       |
|                                       |                                   | W            | 57.85%                       |
|                                       |                                   | Ni           | 0.22%                        |
| Ni <sub>0.03</sub> -BaWO <sub>4</sub> | 0.0472                            | Ba           | 34.56%                       |
|                                       |                                   | W            | 58.92%                       |
|                                       |                                   | Ni           | 0.31%                        |

**Table S6.** The EIS calculation parameters of the Ni<sub>x</sub>-BaWO<sub>4</sub> sample were determined when performing HER in a 1 M KOH solution.

| Samples                               | Rs (Ω) | Error(%) | Rct (Ω) | Error(%) | CPE     | Error(%) |
|---------------------------------------|--------|----------|---------|----------|---------|----------|
| BaWO <sub>4</sub>                     | 29.45  | 1.0722   | 103.8   | 3.1642   | 0.5856  | 2.0774   |
| Ni <sub>0.01</sub> -BaWO <sub>4</sub> | 33.42  | 0.81424  | 31.41   | 3.1859   | 0.02    | 3.5134   |
| Ni <sub>0.02</sub> -BaWO <sub>4</sub> | 39.53  | 1.875    | 50.94   | 3.3092   | 0.5107  | 3.6752   |
| Ni <sub>0.03</sub> -BaWO <sub>4</sub> | 26.52  | 0.76459  | 57.21   | 1.2226   | 0.57799 | 1.3851   |

**Table S7.** Comparison of properties of Ni<sub>0.01</sub>-BaWO<sub>4</sub> and other HER catalysts in alkaline solution

| Catalyst                                                            | Electrolyte                          | Current density (j)    | Overpotential | substrate       | Ref.     |
|---------------------------------------------------------------------|--------------------------------------|------------------------|---------------|-----------------|----------|
| Ni <sub>0.01</sub> -BaWO <sub>4</sub>                               | 1 M KOH                              | 10 mA cm <sup>-2</sup> | 122 mV        | self-supporting | Our work |
| BaBi <sub>1.9</sub> Y <sub>0.1</sub> Nb <sub>2</sub> O <sub>9</sub> | 1 M KOH                              | 10 mA cm <sup>-2</sup> | 180 mV        | NF              | [1]      |
| Mo <sub>2</sub> C                                                   | 1 M KOH                              | 10 mA cm <sup>-2</sup> | 453 mV        | self-supporting | [2]      |
| P/Ni-Mo <sub>2</sub> C@NC-800                                       | 1 M KOH                              | 10 mA cm <sup>-2</sup> | 165 mV        | NC              | [3]      |
| TiN                                                                 | 1 M KOH                              | 10 mA cm <sup>-2</sup> | 483 mV        | self-supporting | [4]      |
| O-SiBCN/rGO                                                         | 0.5 M H <sub>2</sub> SO <sub>4</sub> | 10 mA cm <sup>-2</sup> | 590 mV        | GC              | [5]      |
| PWA-2-1300                                                          | 0.5 M H <sub>2</sub> SO <sub>4</sub> | 10 mA cm <sup>-2</sup> | 286 mV        | GC              | [6]      |
| MoSi <sub>2</sub>                                                   | 0.5 M H <sub>2</sub> SO <sub>4</sub> | 10 mA cm <sup>-2</sup> | 241 mV        | self-supporting | [7]      |
| SiCN/Ni                                                             | 0.5 M H <sub>2</sub> SO <sub>4</sub> | 10 mA cm <sup>-2</sup> | 390 mV        | CP              | [8]      |
| WS <sub>2</sub> /WO <sub>3-x</sub>                                  | 1 M KOH                              | 10 mA cm <sup>-2</sup> | 151 mV        | CP              | [9]      |
| a-WO <sub>x</sub>                                                   | 1 M KOH                              | 10 mA cm <sup>-2</sup> | 185 mV        | CC              | [10]     |

**Table S8.** ICP test results of  $\text{Ni}_{0.01}\text{-BaWO}_4$  after 500 hours of long-term use.

| Sample name                                      | $m_0$ (g) | Test element | Sample element content W (%) |
|--------------------------------------------------|-----------|--------------|------------------------------|
| Pristine $\text{Ni}_{0.01}\text{-BaWO}_4$        | 0.0453    | Ni           | 0.1400%                      |
| $\text{Ni}_{0.01}\text{-BaWO}_4$ after 500 hours | 0.0453    | Ni           | 0.1393%                      |
| $\text{Ni}_{0.01}\text{-BaWO}_4$ after 500 hours | 0.0453    | Ni           | 0.1392%                      |

**Table S9.** Rietveld refinement data of Ni<sub>0.01</sub>-BaWO<sub>4</sub> after 5000 cycles long-term cycling test.

| Sample                                | a axial length (Å) | b axial length (Å) | c axial length (Å) | Volume(Å <sup>3</sup> ) |
|---------------------------------------|--------------------|--------------------|--------------------|-------------------------|
| Ni <sub>0.01</sub> -BaWO <sub>4</sub> | 5.612              | 5.612              | 12.713             | 400.343                 |

**Table S10.** Rietveld refinement data of Ni<sub>0.01</sub>-BaWO<sub>4</sub> after 60 min of ultrasonic vibration.

| <b>Sample</b>                         | <b>a axial length (Å)</b> | <b>b axial length (Å)</b> | <b>c axial length (Å)</b> | <b>Volume(Å<sup>3</sup>)</b> |
|---------------------------------------|---------------------------|---------------------------|---------------------------|------------------------------|
| Ni <sub>0.01</sub> -BaWO <sub>4</sub> | 5.613                     | 5.613                     | 12.718                    | 400.671                      |

## References

- [1] M.K. Adak, D. Mondal, R. Samanta, B. Chakraborty and D. Dhak, *Ceram Int*, 2023, **49**, 1020.
- [2] L. Huo, B. Liu, G. Zhang and J. Zhang, *ACS Appl. Mater. Interfaces*, 2016, **8**, 18107-18118.
- [3] Z. Li, S. Xu, K. Chu, G. Yao, Y. Xu, P. Niu, Y. Yang and F. Zheng, *Inorg. Chem.*, 2020, **59**, 13741-13748.
- [4] C. Tan, H. Huang, F. Wang, N. Ke, A. Huang, W. Tang, L. Hao, L. Yin, X. Xu, Y. Xian and S. Agathopoulos, *J Power Sources*, 2024, **610**, 234722.
- [5] Q. Hanniet, M. Boussmen, J. Barés, V. Huon, I. Iatsunskyi, E. Coy, M. Bechelany, C. Gervais, D. Voiry, P. Miele and C. Salameh, *Sci. Rep.*, 2020, **10**, 22003.
- [6] Z. Yu, K. Mao and Y. Feng, *J Adv Ceram*, 2021, **10**, 1338-1349.
- [7] N. Ke, H. Huang, F. Wang, A. Huang, C. Tan, B. Dong, Y. Wu, L. Hao, X. Xu and S. Agathopoulos, *ACS Sustainable Chem. Eng.*, 2023, **11**, 3769-3779
- [8] T.-H. Huh, J.H. Jun, J.-H. Lee, S. Moon, Y. Yoon, T. Lim, B.H. Kim and Y.-J. Kwark, *ACS Appl. Energy Mater.*, 2024, **7**, 10397-10406.
- [9] L. Kong, L. Pan, H. Guo, Y. Qiu, W.A. Alshahrani, M.A. Amin and J. Lin, *J Colloid Interf Sci*, 2024, **664**, 178-185.
- [10] J. Chen, J. Zheng, W. He, H. Liang, Y. Li, H. Cui and C. Wang, *Nano Res* 2023, **16**, 4603-4611.
